# Supplementary material for: Novel Yeasts Producing High Levels of Conjugated Linoleic Acid and Organic Acids in Fermented Doughs
Source: MDPI journal article supplement (doi:10.3390/foods10092087), 2021-09-03
Supplement: s1 [file s1]

## Novel yeasts producing high levels of conjugated linoleic acid and organic acids in fermented doughs

Michela Palla, Giuseppe Conte, Arianna Grassi, Semih Esin, Andrea Serra, Marcello Mele, Manuela Giovannetti, Monica Agnolucci

**Supplementary Table S1.** *In vitro* yeasts' production of organic acids

| Strains <sup>a</sup>                       | Halo zone (mm) | SE <sup>1</sup> |
|--------------------------------------------|----------------|-----------------|
| <i>Saccharomyces cerevisiae</i> IMA L10Y   | 5.33           | 0.33            |
| <i>Kazachstania humilis</i> IMA G23Y       | 5.00           | 0.29            |
| <i>Saccharomyces cerevisiae</i> IMA L15Y   | 5.00           | 0.00            |
| <i>Saccharomyces cerevisiae</i> IMA L22Y   | 5.00           | 0.33            |
| <i>Kazachstania humilis</i> DBVPG 6753     | 4.83           | 0.50            |
| <i>Saccharomyces cerevisiae</i> ATCC 32167 | 4.67           | 0.17            |
| <i>Saccharomyces cerevisiae</i> IMA D20Y   | 4.67           | 0.33            |
| <i>Saccharomyces cerevisiae</i> IMA L17Y   | 4.67           | 0.58            |
| <i>Saccharomyces cerevisiae</i> IMA D18Y   | 4.33           | 0.33            |
| <i>Saccharomyces cerevisiae</i> IMA D22Y   | 4.33           | 0.33            |
| <i>Saccharomyces cerevisiae</i> IMA D8Y    | 4.33           | 0.33            |
| <i>Saccharomyces cerevisiae</i> IMA L6Y    | 4.00           | 0.33            |
| <i>Saccharomyces cerevisiae</i> Zeus IBA   | 4.00           | 0.67            |

<sup>a</sup>IMA=International Microbial Archives, Department of Agriculture, Food and Environment, University of Pisa, Pisa, Italy; ATCC=American Type culture Collection, Manassas, Virginia, USA; DBVPG=International Collection of Department of Agricultural, Food and Environmental Science, University of Perugia, Perugia, Italy.

<sup>1</sup>SE: Standard Error.

**Supplementary Table S2.** Fatty acid (g/100 g of total lipids), organic acid (mmol/100 g of dough) and conjugated linoleic acid (CLA) (mg/100 g of total lipids) profiles of blue-grained wheat variety *T. aestivum* L. cv Skorpion fermented doughs, individually inoculated with the two selected yeast strains (*S. cerevisiae* D8Y and L6Y), *K. humilis* IMA G23Y and the commercial baker's yeast *S. cerevisiae* Zeus IBA

|                                | -                  | <i>K. humilis</i><br>IMA G23Y | <i>S.cerevisiae</i> IMA<br>D8Y | <i>S.cerevisiae</i><br>IMA L6Y | <i>S. cerevisiae</i><br>Zeus IBA | SE <sup>1</sup> | P-value |
|--------------------------------|--------------------|-------------------------------|--------------------------------|--------------------------------|----------------------------------|-----------------|---------|
| <i>Saturated</i>               | 12.60              | 13.82                         | 15.23                          | 14.31                          | 14.86                            | 0.93            | 0.368   |
| C14:0                          | 0.08               | 0.08                          | 0.10                           | 0.11                           | 0.08                             | 0.02            | 0.598   |
| C15:0                          | 0.08               | 0.08                          | 0.08                           | 0.09                           | 0.09                             | 0.01            | 0.882   |
| C16:0                          | 11.06              | 12.35                         | 13.10                          | 12.44                          | 13.14                            | 0.86            | 0.469   |
| C17:0                          | 0.09               | 0.09                          | 0.10                           | 0.10                           | 0.10                             | 0.01            | 0.507   |
| C18:0iso                       | 0.00 <sup>B</sup>  | 0.06 <sup>A</sup>             | 0.06 <sup>A</sup>              | 0.04 <sup>A</sup>              | 0.10 <sup>A</sup>                | 0.01            | <0.001  |
| C18:0                          | 0.85               | 0.78                          | 1.23                           | 0.92                           | 0.82                             | 0.18            | 0.445   |
| C20:0                          | 0.12               | 0.12                          | 0.22                           | 0.19                           | 0.11                             | 0.04            | 0.238   |
| C22:0                          | 0.16               | 0.18                          | 0.18                           | 0.18                           | 0.21                             | 0.03            | 0.756   |
| C23:0                          | 0.12               | 0.05                          | 0.07                           | 0.14                           | 0.15                             | 0.03            | 0.112   |
| <i>Monounsaturated</i>         | 8.51               | 10.04                         | 11.84                          | 10.06                          | 11.17                            | 0.72            | 0.067   |
| C16:1c9                        | 0.09 <sup>b</sup>  | 0.14 <sup>a</sup>             | 0.19 <sup>a</sup>              | 0.14 <sup>a</sup>              | 0.16 <sup>a</sup>                | 0.02            | 0.029   |
| C17:1c9                        | 0.05               | 0.04                          | 0.05                           | 0.05                           | 0.05                             | 0.01            | 0.143   |
| C18:1c9                        | 7.78               | 9.01                          | 10.65                          | 9.02                           | 9.92                             | 0.66            | 0.094   |
| C18:1c11                       | 0.61               | 0.76                          | 0.85                           | 0.75                           | 0.85                             | 0.05            | 0.052   |
| <i>Polyunsaturated</i>         | 35.27              | 40.31                         | 39.07                          | 36.54                          | 43.23                            | 2.53            | 0.262   |
| C18:2n-6                       | 31.59              | 35.70                         | 33.49                          | 31.54                          | 37.31                            | 2.19            | 0.317   |
| C18:3n-3                       | 1.89               | 2.22                          | 2.31                           | 1.88                           | 2.29                             | 0.14            | 0.135   |
| C20:2n-6                       | 0.08 <sup>b</sup>  | 0.07 <sup>b</sup>             | 0.09 <sup>b</sup>              | 0.13 <sup>a</sup>              | 0.06 <sup>b</sup>                | 0.02            | 0.015   |
| C20:4n-6                       | 0.04 <sup>B</sup>  | 0.09 <sup>A</sup>             | 0.12 <sup>A</sup>              | 0.10 <sup>A</sup>              | 0.11 <sup>A</sup>                | 0.01            | 0.008   |
| C20:5n-3                       | 0.60               | 0.74                          | 1.16                           | 1.02                           | 1.18                             | 0.16            | 0.093   |
| C22:3n-3                       | 0.69 <sup>b</sup>  | 0.57 <sup>b</sup>             | 1.13 <sup>a</sup>              | 1.11 <sup>a</sup>              | 1.26 <sup>a</sup>                | 0.14            | 0.019   |
| C22:4n-6                       | 0.06 <sup>B</sup>  | 0.05 <sup>B</sup>             | 0.00 <sup>C</sup>              | 0.00 <sup>C</sup>              | 0.27 <sup>A</sup>                | 0.03            | <0.001  |
| C22:5n-6                       | 0.00 <sup>C</sup>  | 0.06 <sup>B</sup>             | 0.05 <sup>B</sup>              | 0.14 <sup>A</sup>              | 0.04 <sup>B</sup>                | 0.02            | 0.004   |
| C22:5n-3                       | 0.15 <sup>a</sup>  | 0.09 <sup>a</sup>             | 0.02 <sup>c</sup>              | 0.00 <sup>c</sup>              | 0.01 <sup>c</sup>                | 0.03            | 0.022   |
| C22:6n-3                       | 0.16               | 0.25                          | 0.26                           | 0.21                           | 0.26                             | 0.03            | 0.171   |
| <i>CLA<sup>2</sup> isomers</i> | 0.00 <sup>C</sup>  | 396.71 <sup>A</sup>           | 450.67 <sup>A</sup>            | 348.06 <sup>B</sup>            | 433.80 <sup>A</sup>              | 28.38           | <0.001  |
| CLA_11-13tt                    | 0.00 <sup>B</sup>  | 2.73 <sup>A</sup>             | 0.00 <sup>B</sup>              | 0.00 <sup>B</sup>              | 0.00 <sup>B</sup>                | 0.14            | <0.001  |
| CLA_10-12tt                    | 0.00 <sup>B</sup>  | 4.98 <sup>A</sup>             | 0.00 <sup>B</sup>              | 0.00 <sup>B</sup>              | 0.00 <sup>B</sup>                | 0.20            | <0.001  |
| CLA_9-11tt                     | 0.00 <sup>B</sup>  | 6.05 <sup>A</sup>             | 0.00 <sup>B</sup>              | 0.00 <sup>B</sup>              | 0.00 <sup>B</sup>                | 0.18            | <0.001  |
| CLA_8-10tt                     | 0.00 <sup>B</sup>  | 70.84 <sup>A</sup>            | 0.00 <sup>B</sup>              | 0.00 <sup>B</sup>              | 0.00 <sup>B</sup>                | 1.52            | <0.001  |
| CLA_11-13ct                    | 0.00 <sup>B</sup>  | 0.00 <sup>B</sup>             | 0.00 <sup>B</sup>              | 0.00 <sup>B</sup>              | 7.24 <sup>A</sup>                | 1.00            | 0.001   |
| CLA_10-12tc                    | 0.00 <sup>D</sup>  | 133.84 <sup>C</sup>           | 394.54 <sup>A</sup>            | 348.94 <sup>A</sup>            | 229.86 <sup>B</sup>              | 23.65           | <0.001  |
| CLA_9-11ct                     | 0.00 <sup>D</sup>  | 138.19 <sup>B</sup>           | 33.96 <sup>C</sup>             | 35.53 <sup>C</sup>             | 191.80 <sup>A</sup>              | 5.51            | <0.001  |
| CLA_8-10tc                     | 0.00 <sup>B</sup>  | 0.00 <sup>B</sup>             | 0.00 <sup>B</sup>              | 0.00 <sup>B</sup>              | 1.29 <sup>A</sup>                | 0.57            | <0.001  |
| CLA_7-9tc                      | 0.00 <sup>B</sup>  | 0.00 <sup>B</sup>             | 0.00 <sup>B</sup>              | 0.00 <sup>B</sup>              | 2.95 <sup>A</sup>                | 2.10            |         |
| <i>Index</i>                   |                    |                               |                                |                                |                                  |                 |         |
| ω-6                            | 31.78              | 35.97                         | 33.75                          | 31.91                          | 37.79                            | 2.19            | 0.296   |
| ω-3                            | 3.50 <sup>b</sup>  | 3.87 <sup>b</sup>             | 4.87 <sup>a</sup>              | 4.22 <sup>a</sup>              | 5.00 <sup>a</sup>                | 0.36            | 0.040   |
| ω-6/ω-3                        | 9.11 <sup>A</sup>  | 9.30 <sup>A</sup>             | 6.99 <sup>B</sup>              | 7.56 <sup>B</sup>              | 7.60 <sup>B</sup>                | 0.35            | 0.003   |
| <i>Organic acid</i>            | 0.534 <sup>C</sup> | 16.711 <sup>B</sup>           | 33.216 <sup>A</sup>            | 20.263 <sup>B</sup>            | 15.339 <sup>B</sup>              | 3.140           | <0.001  |
| lactate                        | 0.250 <sup>D</sup> | 3.981 <sup>A</sup>            | 3.074 <sup>B</sup>             | 1.557 <sup>C</sup>             | 3.700 <sup>A</sup>               | 0.259           | <0.001  |
| acetate                        | 0.000 <sup>C</sup> | 2.398 <sup>A</sup>            | 1.013 <sup>B</sup>             | 0.746 <sup>C</sup>             | 1.052 <sup>B</sup>               | 0.684           | <0.001  |
| propionate                     | 0.284 <sup>D</sup> | 7.833 <sup>C</sup>            | 27.684 <sup>A</sup>            | 16.901 <sup>B</sup>            | 9.391 <sup>C</sup>               | 2.442           | <0.001  |
| butyrate                       | 0.000 <sup>C</sup> | 2.498 <sup>A</sup>            | 1.446 <sup>B</sup>             | 1.059 <sup>B</sup>             | 1.196 <sup>B</sup>               | 0.654           | <0.001  |

<sup>1</sup>SE: Standard Error; <sup>2</sup>CLA: Conjugated Linoleic Acid.

<sup>a-c</sup>: means within rows with different letters significantly differ ( $P \leq 0.05$ )

<sup>A-D</sup>: means within rows with different letters significantly differ ( $P \leq 0.01$ )

**Supplementary Table S3.** Fatty acid (g/100 g of total lipids), organic acid (mmol/100 g of dough) and conjugated linoleic acid (CLA) (mg/100 g of total lipids) profiles of hull-less spring barley variety *Hordeum vulgare* L. var. *nudum* Hook, Rondo fermented doughs, individually inoculated with the two selected yeast strains (*S. cerevisiae* L10Y and L15Y), *K. humilis* IMA G23Y and the commercial baker's yeast *S. cerevisiae* Zeus IBA

|                                | -                  | <i>K. humilis</i><br>IMA G23Y | <i>S.cerevisiae</i> IMA<br>L10Y | <i>S.cerevisiae</i><br>IMA L15Y | <i>S. cerevisiae</i><br>Zeus IBA | SE <sup>1</sup> | P-value |
|--------------------------------|--------------------|-------------------------------|---------------------------------|---------------------------------|----------------------------------|-----------------|---------|
| <i>Saturated</i>               | 16.74 <sup>C</sup> | 18.95 <sup>A</sup>            | 19.58 <sup>A</sup>              | 20.27 <sup>A</sup>              | 18.06 <sup>B</sup>               | 0.54            | 0.007   |
| C14:0                          | 0.16               | 0.24                          | 0.20                            | 0.19                            | 0.19                             | 0.02            | 0.251   |
| C15:0                          | 0.08               | 0.09                          | 0.08                            | 0.09                            | 0.08                             | 0.00            | 0.079   |
| C16:0                          | 14.68 <sup>D</sup> | 16.51 <sup>B</sup>            | 16.58 <sup>B</sup>              | 17.53 <sup>A</sup>              | 15.62 <sup>C</sup>               | 0.39            | 0.004   |
| C17:0                          | 0.07               | 0.08                          | 0.09                            | 0.09                            | 0.08                             | 0.00            | 0.053   |
| C18:0iso                       | 0.00 <sup>B</sup>  | 0.15 <sup>A</sup>             | 0.00 <sup>B</sup>               | 0.00 <sup>B</sup>               | 0.00 <sup>B</sup>                | 0.01            | <0.001  |
| C18:0                          | 0.99               | 1.27                          | 1.42                            | 1.22                            | 1.40                             | 0.17            | 0.456   |
| C20:0                          | 0.17 <sup>C</sup>  | 0.20 <sup>C</sup>             | 0.65 <sup>A</sup>               | 0.43 <sup>B</sup>               | 0.19 <sup>C</sup>                | 0.04            | <0.001  |
| C22:0                          | 0.22               | 0.26                          | 0.23                            | 0.26                            | 0.22                             | 0.02            | 0.160   |
| C23:0                          | 0.10 <sup>b</sup>  | 0.04 <sup>b</sup>             | 0.20 <sup>a</sup>               | 0.25 <sup>a</sup>               | 0.22 <sup>a</sup>                | 0.04            | 0.011   |
| <i>Monounsaturated</i>         | 11.18 <sup>b</sup> | 13.10 <sup>a</sup>            | 12.78 <sup>a</sup>              | 12.31 <sup>a</sup>              | 13.72 <sup>a</sup>               | 0.48            | 0.036   |
| C16:1c9                        | 0.09 <sup>c</sup>  | 0.15 <sup>b</sup>             | 0.20 <sup>a</sup>               | 0.21 <sup>a</sup>               | 0.23 <sup>a</sup>                | 0.02            | 0.016   |
| C17:1c9                        | 0.13               | 0.13                          | 0.16                            | 0.15                            | 0.15                             | 0.01            | 0.082   |
| C18:1c9                        | 11.21              | 12.11                         | 11.56                           | 11.06                           | 12.45                            | 0.46            | 0.142   |
| C18:1c11                       | 0.59               | 0.68                          | 0.68                            | 0.69                            | 0.70                             | 0.02            | 0.132   |
| <i>Polyunsaturated</i>         | 33.43              | 36.31                         | 32.98                           | 34.81                           | 30.89                            | 1.56            | 0.226   |
| C18:2n-6                       | 28.78              | 30.80                         | 28.12                           | 28.52                           | 24.53                            | 1.56            | 0.153   |
| C18:3n-3                       | 1.89               | 2.06                          | 1.92                            | 1.80                            | 1.78                             | 0.18            | 0.803   |
| C20:2n-6                       | 0.06 <sup>B</sup>  | 0.07 <sup>B</sup>             | 0.18 <sup>A</sup>               | 0.23 <sup>A</sup>               | 0.07 <sup>B</sup>                | 0.03            | 0.003   |
| C20:4n-6                       | 0.08 <sup>C</sup>  | 0.20 <sup>A</sup>             | 0.127 <sup>B</sup>              | 0.20 <sup>A</sup>               | 0.13 <sup>B</sup>                | 0.01            | <0.001  |
| C20:5n-3                       | 1.05 <sup>B</sup>  | 1.13 <sup>B</sup>             | 0.11 <sup>C</sup>               | 1.23 <sup>B</sup>               | 1.52 <sup>A</sup>                | 0.09            | <0.001  |
| C22:3n-3                       | 1.30 <sup>B</sup>  | 0.87 <sup>C</sup>             | 1.51 <sup>B</sup>               | 1.81 <sup>A</sup>               | 1.91 <sup>A</sup>                | 0.16            | 0.006   |
| C22:4n-6                       | 0.13 <sup>A</sup>  | 0.06 <sup>B</sup>             | 0.00 <sup>C</sup>               | 0.00 <sup>C</sup>               | 0.13 <sup>A</sup>                | 0.01            | <0.001  |
| C22:5n-6                       | 0.03 <sup>B</sup>  | 0.06 <sup>A</sup>             | 0.03 <sup>B</sup>               | 0.00 <sup>C</sup>               | 0.00 <sup>C</sup>                | 0.00            | <0.001  |
| C22:5n-3                       | 0.00 <sup>B</sup>  | 0.14 <sup>A</sup>             | 0.00 <sup>B</sup>               | 0.00 <sup>B</sup>               | 0.00 <sup>B</sup>                | 0.00            | <0.001  |
| C22:6n-3                       | 0.11               | 0.16                          | 0.12                            | 0.13                            | 0.12                             | 0.02            | 0.434   |
| <i>CLA<sup>2</sup> isomers</i> | 0.00 <sup>B</sup>  | 710.43 <sup>A</sup>           | 715.04 <sup>A</sup>             | 728.50 <sup>A</sup>             | 703.85 <sup>A</sup>              | 10.38           | <0.001  |
| CLA_11-13tt                    | 0.00 <sup>B</sup>  | 37.80 <sup>A</sup>            | 0.00 <sup>B</sup>               | 0.00 <sup>B</sup>               | 0.00 <sup>B</sup>                | 8.53            | <0.001  |
| CLA_10-12tt                    | 0.00 <sup>B</sup>  | 5.89 <sup>A</sup>             | 0.00 <sup>B</sup>               | 0.00 <sup>B</sup>               | 0.00 <sup>B</sup>                | 0.17            | <0.001  |
| CLA_9-11tt                     | 0.00 <sup>B</sup>  | 15.07 <sup>A</sup>            | 0.00 <sup>B</sup>               | 0.00 <sup>B</sup>               | 0.00 <sup>B</sup>                | 1.25            | <0.001  |
| CLA_8-10tt                     | 0.00 <sup>B</sup>  | 117.57 <sup>A</sup>           | 0.00 <sup>B</sup>               | 0.00 <sup>B</sup>               | 0.00 <sup>B</sup>                | 2.68            | <0.001  |
| CLA_11-13ct                    | 0.00 <sup>C</sup>  | 52.22 <sup>A</sup>            | 0.00 <sup>C</sup>               | 0.00 <sup>C</sup>               | 15.00 <sup>B</sup>               | 1.93            | <0.001  |
| CLA_10-12tc                    | 0.00 <sup>D</sup>  | 186.31 <sup>C</sup>           | 667.41 <sup>A</sup>             | 658.85 <sup>A</sup>             | 396.09 <sup>B</sup>              | 8.99            | <0.001  |
| CLA_9-11ct                     | 0.00 <sup>D</sup>  | 194.81 <sup>B</sup>           | 48.32 <sup>C</sup>              | 69.39 <sup>C</sup>              | 292.83 <sup>A</sup>              | 13.43           | <0.001  |
| CLA_8-10tc                     | 0.00 <sup>B</sup>  | 92.74 <sup>A</sup>            | 0.00 <sup>B</sup>               | 0.00 <sup>B</sup>               | 0.00 <sup>B</sup>                | 5.78            | <0.001  |
| <i>Index</i>                   |                    |                               |                                 |                                 |                                  |                 |         |
| ω-6                            | 29.09              | 31.19                         | 28.46                           | 28.95                           | 24.86                            | 1.57            | 0.152   |
| ω-3                            | 4.35 <sup>B</sup>  | 4.35 <sup>B</sup>             | 3.67 <sup>C</sup>               | 4.98 <sup>A</sup>               | 5.33 <sup>A</sup>                | 0.11            | <0.001  |
| ω-6/ω-3                        | 6.69 <sup>B</sup>  | 7.19 <sup>A</sup>             | 7.74 <sup>A</sup>               | 5.83 <sup>C</sup>               | 4.67 <sup>D</sup>                | 0.39            | 0.002   |
| <i>Organic acid</i>            | 1.515 <sup>D</sup> | 17.096 <sup>C</sup>           | 38.326 <sup>B</sup>             | 65.610 <sup>A</sup>             | 30.980 <sup>B</sup>              | 3.043           | <0.001  |
| lactate                        | 1.216 <sup>D</sup> | 7.267 <sup>A</sup>            | 3.867 <sup>B</sup>              | 7.038 <sup>A</sup>              | 1.709 <sup>C</sup>               | 0.278           | 0.023   |
| acetate                        | 0.026 <sup>C</sup> | 1.575 <sup>A</sup>            | 0.909 <sup>B</sup>              | 1.365 <sup>A</sup>              | 0.655 <sup>B</sup>               | 0.278           | 0.034   |
| propionate                     | 0.273 <sup>D</sup> | 6.637 <sup>C</sup>            | 25.172 <sup>B</sup>             | 45.855 <sup>A</sup>             | 18.735 <sup>B</sup>              | 2.314           | <0.001  |
| butyrate                       | 0.000 <sup>D</sup> | 1.617 <sup>C</sup>            | 8.377 <sup>B</sup>              | 11.351 <sup>A</sup>             | 9.880 <sup>B</sup>               | 0.204           | <0.001  |

<sup>1</sup>SE: Standard Error; <sup>2</sup>CLA: Conjugated Linoleic Acid.

<sup>a-c</sup>: means within rows with different letters significantly differ ( $P \leq 0.05$ )

<sup>A-D</sup>: means within rows with different letters significantly differ ( $P \leq 0.01$ )

**Supplementary Table S4.** Fatty acid (g/100 g of total lipids), organic acid (mmol/100 g of dough) and conjugated linoleic acid (CLA) (mg/100 g of total lipids) profiles of conventional red-grained wheat variety *T. aestivum* L. cv Aubusson fermented doughs, individually inoculated with the two selected yeast strains (*S. cerevisiae* D20Y and D22Y), *K. humilis* IMA G23Y and the commercial baker's yeast *S. cerevisiae* Zeus IBA

|                                | -                  | <i>K. humilis</i><br>IMA G23Y | <i>S. cerevisiae</i><br>IMA D20Y | <i>S. cerevisiae</i><br>IMA D22Y | <i>S. cerevisiae</i><br>Zeus IBA | SE <sup>1</sup> | P-value |
|--------------------------------|--------------------|-------------------------------|----------------------------------|----------------------------------|----------------------------------|-----------------|---------|
| <i>Saturated</i>               | 14.35              | 15.67                         | 14.92                            | 14.72                            | 14.32                            | 0.79            | 0.231   |
| C14:0                          | 0.10               | 0.09                          | 0.10                             | 0.10                             | 0.08                             | 0.01            | 0.143   |
| C15:0                          | 0.09               | 0.08                          | 0.10                             | 0.10                             | 0.09                             | 0.01            | 0.266   |
| C16:0                          | 12.64              | 14.23                         | 13.04                            | 12.78                            | 12.53                            | 0.46            | 0.135   |
| C17:0                          | 0.10               | 0.09                          | 0.07                             | 0.09                             | 0.09                             | 0.09            | 0.766   |
| C18:0iso                       | 0.01 <sup>C</sup>  | 0.00 <sup>C</sup>             | 0.06 <sup>A</sup>                | 0.03 <sup>B</sup>                | 0.05 <sup>A</sup>                | 0.00            | <0.001  |
| C18:0                          | 0.94               | 0.94                          | 1.09                             | 1.09                             | 0.87                             | 0.06            | 0.078   |
| C20:0                          | 0.13 <sup>c</sup>  | 0.14 <sup>b</sup>             | 0.18 <sup>b</sup>                | 0.21 <sup>a</sup>                | 0.16 <sup>b</sup>                | 0.02            | 0.031   |
| C22:0                          | 0.17 <sup>B</sup>  | 0.10 <sup>C</sup>             | 0.21 <sup>A</sup>                | 0.18 <sup>AB</sup>               | 0.20 <sup>A</sup>                | 0.02            | 0.008   |
| C23:0                          | 0.11 <sup>B</sup>  | 0.00 <sup>D</sup>             | 0.03 <sup>D</sup>                | 0.07 <sup>C</sup>                | 0.20 <sup>A</sup>                | 0.01            | <0.001  |
| <i>Monounsaturated</i>         | 9.63               | 10.86                         | 11.37                            | 10.92                            | 10.72                            | 0.41            | 0.110   |
| C16:1c9                        | 0.09 <sup>B</sup>  | 0.16 <sup>A</sup>             | 0.16 <sup>A</sup>                | 0.15 <sup>A</sup>                | 0.17 <sup>A</sup>                | 0.01            | 0.009   |
| C17:1c9                        | 0.01               | 0.04                          | 0.03                             | 0.04                             | 0.04                             | 0.01            | 0.091   |
| C18:1c9                        | 8.86               | 9.91                          | 10.29                            | 9.94                             | 9.60                             | 0.39            | 0.177   |
| C18:1c11                       | 0.62               | 0.73                          | 0.72                             | 0.69                             | 0.68                             | 0.03            | 0.097   |
| <i>Polyunsaturated</i>         | 39.88 <sup>b</sup> | 46.58 <sup>a</sup>            | 40.29 <sup>b</sup>               | 38.80 <sup>b</sup>               | 38.19 <sup>b</sup>               | 1.67            | 0.033   |
| C18:2n-6                       | 35.88 <sup>b</sup> | 42.08 <sup>a</sup>            | 34.71 <sup>b</sup>               | 34.64 <sup>b</sup>               | 32.54 <sup>b</sup>               | 1.64            | 0.019   |
| C18:3n-3                       | 2.12 <sup>B</sup>  | 2.56 <sup>A</sup>             | 1.97 <sup>B</sup>                | 2.00 <sup>B</sup>                | 1.82 <sup>B</sup>                | 0.12            | 0.011   |
| C20:2n-6                       | 0.17 <sup>B</sup>  | 0.24 <sup>A</sup>             | 0.07 <sup>C</sup>                | 0.09 <sup>C</sup>                | 0.06 <sup>C</sup>                | 0.01            | <0.001  |
| C20:4n-6                       | 0.09               | 0.08                          | 0.11                             | 0.11                             | 0.10                             | 0.01            | 0.407   |
| C20:5n-3                       | 0.59 <sup>B</sup>  | 0.32 <sup>B</sup>             | 1.05 <sup>A</sup>                | 0.11 <sup>C</sup>                | 1.27 <sup>A</sup>                | 0.12            | <0.001  |
| C22:3n-3                       | 0.67 <sup>C</sup>  | 0.26 <sup>D</sup>             | 1.20 <sup>A</sup>                | 0.96 <sup>B</sup>                | 1.36 <sup>A</sup>                | 0.12            | <0.001  |
| C22:4n-6                       | 0.06 <sup>C</sup>  | 0.31 <sup>A</sup>             | 0.09 <sup>B</sup>                | 0.03 <sup>C</sup>                | 0.12 <sup>B</sup>                | 0.02            | <0.001  |
| C22:5n-6                       | 0.09 <sup>A</sup>  | 0.00 <sup>C</sup>             | 0.05 <sup>B</sup>                | 0.05 <sup>B</sup>                | 0.04 <sup>B</sup>                | 0.00            | <0.001  |
| C22:5n-3                       | 0.00 <sup>C</sup>  | 0.07 <sup>B</sup>             | 0.15 <sup>A</sup>                | 0.01 <sup>C</sup>                | 0.02 <sup>C</sup>                | 0.04            | <0.001  |
| C22:6n-3                       | 0.20 <sup>B</sup>  | 0.12 <sup>C</sup>             | 0.27 <sup>A</sup>                | 0.23 <sup>B</sup>                | 0.25 <sup>A</sup>                | 0.02            | 0.002   |
| <i>CLA<sup>2</sup> isomers</i> | 0.00 <sup>B</sup>  | 548.15 <sup>A</sup>           | 555.23 <sup>A</sup>              | 535.56 <sup>A</sup>              | 560.35 <sup>A</sup>              | 23.87           | <0.001  |
| CLA_11-13tt                    | 0.00 <sup>B</sup>  | 10.71 <sup>A</sup>            | 0.00 <sup>B</sup>                | 0.00 <sup>B</sup>                | 0.00 <sup>B</sup>                | 1.99            | <0.001  |
| CLA_10-12tt                    | 0.00 <sup>B</sup>  | 8.98 <sup>A</sup>             | 0.00 <sup>B</sup>                | 0.00 <sup>B</sup>                | 0.00 <sup>B</sup>                | 0.35            | <0.001  |
| CLA_9-11tt                     | 0.00 <sup>B</sup>  | 68.23 <sup>A</sup>            | 0.00 <sup>B</sup>                | 0.00 <sup>B</sup>                | 0.00 <sup>B</sup>                | 0.38            | <0.001  |
| CLA_8-10tt                     | 0.00 <sup>B</sup>  | 38.08 <sup>A</sup>            | 0.00 <sup>B</sup>                | 0.00 <sup>B</sup>                | 0.00 <sup>B</sup>                | 1.47            | <0.001  |
| CLA_11-13ct                    | 0.00 <sup>B</sup>  | 0.00 <sup>B</sup>             | 0.00 <sup>B</sup>                | 0.00 <sup>B</sup>                | 18.51 <sup>A</sup>               | 1.41            | <0.001  |
| CLA_10-12tc                    | 0.00 <sup>D</sup>  | 221.25 <sup>C</sup>           | 427.89 <sup>A</sup>              | 346.72 <sup>B</sup>              | 225.25 <sup>C</sup>              | 28.54           | <0.001  |
| CLA_9-11ct                     | 0.00 <sup>C</sup>  | 178.95 <sup>A</sup>           | 126.93 <sup>B</sup>              | 119.72 <sup>B</sup>              | 236.64 <sup>A</sup>              | 30.29           | <0.001  |
| CLA_8-10tc                     | 0.00 <sup>C</sup>  | 21.57 <sup>A</sup>            | 0.00 <sup>C</sup>                | 0.00 <sup>C</sup>                | 12.10 <sup>B</sup>               | 3.22            | 0.002   |
| CLA_7-9tc                      | 0.00 <sup>B</sup>  | 0.00 <sup>B</sup>             | 0.00 <sup>B</sup>                | 0.00 <sup>B</sup>                | 13.23 <sup>A</sup>               | 0.93            | <0.001  |
| <i>Index</i>                   |                    |                               |                                  |                                  |                                  |                 |         |
| ω-6                            | 36.29 <sup>b</sup> | 42.71 <sup>a</sup>            | 35.03 <sup>b</sup>               | 34.91 <sup>b</sup>               | 32.87 <sup>b</sup>               | 1.62            | 0.014   |
| ω-3                            | 3.56 <sup>B</sup>  | 3.32 <sup>B</sup>             | 4.64 <sup>A</sup>                | 3.31 <sup>B</sup>                | 4.73 <sup>A</sup>                | 0.17            | <0.001  |
| ω-6/ ω-3                       | 10.18 <sup>B</sup> | 12.87 <sup>A</sup>            | 7.54 <sup>C</sup>                | 10.56 <sup>B</sup>               | 7.04 <sup>C</sup>                | 0.42            | <0.001  |
| <i>Organic acid</i>            | 0.39 <sup>C</sup>  | 10.76 <sup>B</sup>            | 24.41 <sup>A</sup>               | 26.31 <sup>A</sup>               | 21.32 <sup>A</sup>               | 3.43            | <0.001  |
| lactate                        | 0.21 <sup>C</sup>  | 2.82 <sup>A</sup>             | 1.43 <sup>B</sup>                | 2.84 <sup>A</sup>                | 1.99 <sup>B</sup>                | 0.36            | <0.001  |
| acetate                        | 0.02 <sup>C</sup>  | 1.01 <sup>A</sup>             | 0.61 <sup>B</sup>                | 0.65 <sup>B</sup>                | 1.30 <sup>A</sup>                | 0.14            | <0.001  |
| propionate                     | 0.16 <sup>D</sup>  | 5.45 <sup>C</sup>             | 19.76 <sup>A</sup>               | 21.09 <sup>A</sup>               | 15.87 <sup>B</sup>               | 2.75            | <0.001  |
| butyrate                       | 0.00 <sup>C</sup>  | 1.48 <sup>B</sup>             | 2.61 <sup>A</sup>                | 1.72 <sup>B</sup>                | 2.15 <sup>A</sup>                | 0.31            | <0.001  |

<sup>1</sup>SE: Standard Error; <sup>2</sup>CLA: Conjugated Linoleic Acid.

<sup>a-c</sup>: means within rows with different letters significantly differ ( $P \leq 0.05$ )

<sup>A-D</sup>: means within rows with different letters significantly differ ( $P \leq 0.01$ )

**Supplementary Table S5.** Fatty acid (g/100 g of total lipids), organic acid (mmol/100 g of dough) and conjugated linoleic acid (CLA) (mg/100 g of total lipids) profiles of winter emmer variety *Triticum turgidum* subsp. *dicoccum* var. *Schrank*, Giovanni Paolo fermented doughs, individually inoculated with the two selected yeast strains (*S. cerevisiae* D18Y and L22Y), *K. humilis* IMA G23Y and the commercial baker's yeast *S. cerevisiae* Zeus IBA

|                                | -                  | <i>K. humilis</i><br>IMA G23Y | <i>S. cerevisiae</i><br>D18Y | <i>S. cerevisiae</i><br>IMA L22Y | <i>S. cerevisiae</i><br>Zeus IBA | SE <sup>1</sup> | P-value |
|--------------------------------|--------------------|-------------------------------|------------------------------|----------------------------------|----------------------------------|-----------------|---------|
| <i>Saturated</i>               | 20.39 <sup>A</sup> | 13.95 <sup>B</sup>            | 14.01 <sup>B</sup>           | 15.33 <sup>B</sup>               | 13.10 <sup>B</sup>               | 0.48            | <0.001  |
| C14:0                          | 0.07               | 0.09                          | 0.07                         | 0.14                             | 0.06                             | 0.01            | 0.348   |
| C15:0                          | 0.07               | 0.10                          | 0.10                         | 0.10                             | 0.10                             | 0.01            | 0.223   |
| C16:0                          | 12.82 <sup>a</sup> | 12.07 <sup>a</sup>            | 12.14 <sup>a</sup>           | 13.02 <sup>a</sup>               | 11.31 <sup>b</sup>               | 0.28            | 0.011   |
| C17:0                          | 0.08               | 0.07                          | 0.07                         | 0.08                             | 0.07                             | 0.00            | 0.061   |
| C18:0iso                       | 0.00 <sup>B</sup>  | 0.03 <sup>A</sup>             | 0.04 <sup>A</sup>            | 0.04 <sup>A</sup>                | 0.03 <sup>A</sup>                | 0.01            | 0.009   |
| C18:0                          | 1.16               | 1.11                          | 1.10                         | 1.48                             | 1.00                             | 0.14            | 0.215   |
| C20:0                          | 0.17               | 0.19                          | 0.18                         | 0.19                             | 0.18                             | 0.00            | 0.056   |
| C22:0                          | 0.12 <sup>B</sup>  | 0.24 <sup>A</sup>             | 0.25 <sup>A</sup>            | 0.22 <sup>A</sup>                | 0.22 <sup>A</sup>                | 0.02            | 0.002   |
| C23:0                          | 0.00 <sup>C</sup>  | 0.05 <sup>B</sup>             | 0.01 <sup>C</sup>            | 0.01 <sup>C</sup>                | 0.07 <sup>A</sup>                | 0.01            | <0.001  |
| <i>Monounsaturated</i>         | 16.40              | 16.05                         | 15.95                        | 16.04                            | 15.63                            | 0.40            | 0.749   |
| C16:1c9                        | 0.18               | 0.18                          | 0.19                         | 0.19                             | 0.18                             | 0.01            | 0.844   |
| C17:1c9                        | 0.04               | 0.03                          | 0.03                         | 0.04                             | 0.03                             | 0.00            | 0.146   |
| C18:1c9                        | 15.35              | 14.92                         | 14.78                        | 14.80                            | 14.53                            | 0.38            | 0.660   |
| C18:1c11                       | 0.81               | 0.79                          | 0.78                         | 0.78                             | 0.77                             | 0.81            | 0.738   |
| <i>Polyunsaturated</i>         | 45.30 <sup>a</sup> | 43.01 <sup>a</sup>            | 38.90 <sup>b</sup>           | 39.19 <sup>b</sup>               | 39.36 <sup>b</sup>               | 1.50            | 0.044   |
| C18:2n-6                       | 35.56              | 38.41                         | 34.50                        | 34.40                            | 34.73                            | 1.43            | 0.121   |
| C18:3n-3                       | 2.75               | 2.59                          | 2.06                         | 2.15                             | 2.15                             | 0.13            | 0.113   |
| C20:2n-6                       | 0.23 <sup>A</sup>  | 0.06 <sup>B</sup>             | 0.06 <sup>B</sup>            | 0.06 <sup>B</sup>                | 0.05 <sup>B</sup>                | 0.00            | <0.001  |
| C20:4n-6                       | 0.03 <sup>c</sup>  | 0.13 <sup>a</sup>             | 0.04 <sup>c</sup>            | 0.05 <sup>c</sup>                | 0.08 <sup>b</sup>                | 0.02            | 0.019   |
| C20:5n-3                       | 0.17 <sup>C</sup>  | 0.39 <sup>B</sup>             | 0.67 <sup>A</sup>            | 0.53 <sup>A</sup>                | 0.68 <sup>A</sup>                | 0.08            | 0.003   |
| C22:3n-3                       | 0.12 <sup>C</sup>  | 0.29 <sup>B</sup>             | 0.44 <sup>B</sup>            | 0.37 <sup>B</sup>                | 0.63 <sup>A</sup>                | 0.07            | 0.006   |
| C22:4n-6                       | 0.26 <sup>A</sup>  | 0.06 <sup>B</sup>             | 0.07 <sup>B</sup>            | 0.07 <sup>B</sup>                | 0.06 <sup>B</sup>                | 0.01            | <0.001  |
| C22:5n-6                       | 0.00 <sup>C</sup>  | 0.05 <sup>A</sup>             | 0.01 <sup>B</sup>            | 0.02 <sup>B</sup>                | 0.02 <sup>B</sup>                | 0.01            | <0.001  |
| C22:5n-3                       | 0.08 <sup>A</sup>  | 0.05 <sup>B</sup>             | 0.02 <sup>C</sup>            | 0.02 <sup>C</sup>                | 0.02 <sup>C</sup>                | 0.01            | <0.001  |
| C22:6n-3                       | 0.10               | 0.18                          | 0.15                         | 0.13                             | 0.11                             | 0.02            | 0.056   |
| <i>CLA<sup>2</sup> isomers</i> | 0.00 <sup>B</sup>  | 800.56 <sup>A</sup>           | 797.05 <sup>A</sup>          | 792.70 <sup>A</sup>              | 784.27 <sup>A</sup>              | 0.02            | <0.001  |
| CLA_11-13tt                    | 0.00 <sup>C</sup>  | 8.77 <sup>A</sup>             | 3.53 <sup>B</sup>            | 6.23 <sup>A</sup>                | 2.23 <sup>B</sup>                | 1.30            | 0.006   |
| CLA_10-12tt                    | 0.00 <sup>C</sup>  | 15.71 <sup>A</sup>            | 9.23 <sup>B</sup>            | 9.77 <sup>B</sup>                | 6.88 <sup>B</sup>                | 1.52            | <0.001  |
| CLA_9-11tt                     | 0.00 <sup>C</sup>  | 15.11 <sup>B</sup>            | 118.34 <sup>A</sup>          | 111.55 <sup>A</sup>              | 5.99 <sup>B</sup>                | 14.08           | <0.001  |
| CLA_8-10tt                     | 0.00 <sup>D</sup>  | 139.94 <sup>A</sup>           | 43.90 <sup>B</sup>           | 55.80 <sup>B</sup>               | 10.27 <sup>C</sup>               | 8.14            | <0.001  |
| CLA_11-13ct                    | 0.00 <sup>C</sup>  | 0.00 <sup>C</sup>             | 35.04 <sup>A</sup>           | 48.56 <sup>A</sup>               | 18.42 <sup>B</sup>               | 6.37            | <0.001  |
| CLA_10-12tc                    | 0.00 <sup>C</sup>  | 263.82 <sup>A</sup>           | 165.66 <sup>B</sup>          | 207.69 <sup>B</sup>              | 292.16 <sup>A</sup>              | 26.36           | <0.001  |
| CLA_9-11ct                     | 0.00 <sup>B</sup>  | 265.02 <sup>A</sup>           | 331.04 <sup>A</sup>          | 243.93 <sup>A</sup>              | 287.16 <sup>A</sup>              | 43.54           | <0.001  |
| CLA_8-10tc                     | 0.00 <sup>B</sup>  | 0.00 <sup>B</sup>             | 40.95 <sup>A</sup>           | 30.67 <sup>A</sup>               | 51.39 <sup>A</sup>               | 9.75            | 0.011   |
| CLA_7-9tc                      | 0.00 <sup>B</sup>  | 0.00 <sup>B</sup>             | 0.00 <sup>B</sup>            | 0.00 <sup>B</sup>                | 41.21 <sup>A</sup>               | 0.57            |         |
| <i>Index</i>                   |                    |                               |                              |                                  |                                  |                 |         |
| ω-6                            | 42.09 <sup>a</sup> | 38.71 <sup>b</sup>            | 34.69 <sup>c</sup>           | 35.15 <sup>c</sup>               | 34.93 <sup>c</sup>               | 1.44            | 0.017   |
| ω-3                            | 3.21               | 3.50                          | 3.33                         | 3.20                             | 3.60                             | 0.13            | 0.215   |
| ω-6/ω-3                        | 13.10 <sup>A</sup> | 11.07 <sup>B</sup>            | 10.41 <sup>B</sup>           | 11.03 <sup>B</sup>               | 9.79 <sup>B</sup>                | 0.48            | 0.006   |
| <i>Organic acid</i>            | 0.54 <sup>C</sup>  | 20.87 <sup>B</sup>            | 33.37 <sup>A</sup>           | 28.46 <sup>A</sup>               | 31.41 <sup>A</sup>               | 2.48            | <0.001  |
| lactate                        | 0.32 <sup>D</sup>  | 7.56 <sup>A</sup>             | 3.24 <sup>C</sup>            | 4.64 <sup>C</sup>                | 6.60 <sup>B</sup>                | 0.13            | <0.001  |
| acetate                        | 0.02 <sup>C</sup>  | 2.22 <sup>A</sup>             | 0.92 <sup>B</sup>            | 1.10 <sup>B</sup>                | 1.10 <sup>B</sup>                | 0.27            | <0.001  |
| propionate                     | 0.20 <sup>D</sup>  | 9.60 <sup>C</sup>             | 26.63 <sup>A</sup>           | 21.18 <sup>B</sup>               | 20.25 <sup>B</sup>               | 2.09            | <0.001  |
| butyrate                       | 0.00 <sup>D</sup>  | 1.44 <sup>C</sup>             | 2.59 <sup>B</sup>            | 1.545 <sup>C</sup>               | 3.47 <sup>A</sup>                | 0.21            | <0.001  |

<sup>1</sup>SE: Standard Error; <sup>2</sup>CLA: Conjugated Linoleic Acid.

<sup>a-c</sup>: means within rows with different letters significantly differ (P ≤ 0.05)

<sup>A-D</sup>: means within rows with different letters significantly differ (P ≤ 0.01)

**Supplementary Table S6.** Fatty acid (g/100 g of total lipids), organic acid (mmol/100 g of dough) and conjugated linoleic acid (CLA) (mg/100 g of total lipids) profiles of yellow-grained wheat variety *T. aestivum* L. cv Bona Vita fermented doughs, individually inoculated with the two selected yeast strains (*S. cerevisiae* L17Y and L22Y), *K. humilis* IMA G23Y and the commercial baker's yeast *S. cerevisiae* Zeus IBA

|                                | -                  | <i>K. humilis</i><br>IMA G23Y | <i>S.cerevisiae</i> IMA<br>L17Y | <i>S.cerevisiae</i><br>IMA L22Y | <i>S. cerevisiae</i><br>Zeus IBA | SE <sup>1</sup> | P-value |
|--------------------------------|--------------------|-------------------------------|---------------------------------|---------------------------------|----------------------------------|-----------------|---------|
| <i>Saturated</i>               | 22.39 <sup>A</sup> | 13.52 <sup>B</sup>            | 12.48 <sup>B</sup>              | 12.35 <sup>B</sup>              | 13.15 <sup>B</sup>               | 0.45            | <0.001  |
| C14:0                          | 0.14               | 0.11                          | 0.08                            | 0.07                            | 0.08                             | 0.30            | <0.001  |
| C15:0                          | 0.07               | 0.08                          | 0.07                            | 0.07                            | 0.08                             | 0.00            | 0.132   |
| C16:0                          | 12.25 <sup>A</sup> | 11.79 <sup>A</sup>            | 10.63 <sup>B</sup>              | 10.63 <sup>B</sup>              | 11.51 <sup>A</sup>               | 0.21            | <0.001  |
| C17:0                          | 0.08               | 0.08                          | 0.08                            | 0.08                            | 0.08                             | 0.00            | 0.094   |
| C18:0iso                       | 0.00 <sup>C</sup>  | 0.05 <sup>A</sup>             | 0.03 <sup>B</sup>               | 0.03 <sup>B</sup>               | 0.05 <sup>A</sup>                | 0.01            | 0.002   |
| C18:0                          | 1.02               | 1.04                          | 0.91                            | 0.90                            | 0.94                             | 0.05            | 0.172   |
| C20:0                          | 0.11               | 0.12                          | 0.11                            | 0.11                            | 0.11                             | 0.00            | 0.318   |
| C22:0                          | 0.05 <sup>C</sup>  | 0.20 <sup>A</sup>             | 0.15 <sup>B</sup>               | 0.15 <sup>B</sup>               | 0.19 <sup>A</sup>                | 0.01            | <0.001  |
| C23:0                          | 0.00 <sup>C</sup>  | 0.05 <sup>B</sup>             | 0.36 <sup>A</sup>               | 0.26 <sup>A</sup>               | 0.06 <sup>B</sup>                | 0.07            | 0.013   |
| <i>Monounsaturated</i>         | 10.14              | 11.25                         | 10.27                           | 10.36                           | 10.46                            | 0.24            | 0.060   |
| C16:1c9                        | 0.11 <sup>B</sup>  | 0.15 <sup>A</sup>             | 0.14 <sup>A</sup>               | 0.13 <sup>A</sup>               | 0.15 <sup>A</sup>                | 0.01            | 0.009   |
| C17:1c9                        | 0.03               | 0.03                          | 0.03                            | 0.03                            | 0.04                             | 0.00            | 0.078   |
| C18:1c9                        | 9.29               | 10.27                         | 9.30                            | 9.42                            | 9.53                             | 0.24            | 0.077   |
| C18:1c11                       | 0.68               | 0.71                          | 0.66                            | 0.66                            | 0.68                             | 0.02            | 0.251   |
| <i>Polyunsaturated</i>         | 41.34              | 41.68                         | 38.93                           | 38.92                           | 36.22                            | 0.30            | 0.299   |
| C18:2n-6                       | 37.83              | 36.90                         | 33.93                           | 33.98                           | 31.96                            | 1.97            | 0.281   |
| C18:3n-3                       | 2.18               | 2.13                          | 1.89                            | 1.84                            | 1.68                             | 0.16            | 0.242   |
| C20:2n-6                       | 0.20 <sup>A</sup>  | 0.06 <sup>B</sup>             | 0.05 <sup>B</sup>               | 0.00 <sup>C</sup>               | 0.05 <sup>B</sup>                | 0.01            | <0.001  |
| C20:4n-6                       | 0.09               | 0.11                          | 0.10                            | 0.07                            | 0.07                             | 0.01            | 0.185   |
| C20:5n-3                       | 0.40 <sup>C</sup>  | 0.82 <sup>B</sup>             | 1.15 <sup>A</sup>               | 1.20 <sup>A</sup>               | 1.04 <sup>A</sup>                | 0.16            | 0.027   |
| C22:3n-3                       | 0.27 <sup>C</sup>  | 0.62 <sup>B</sup>             | 1.22 <sup>A</sup>               | 1.267 A                         | 0.65 <sup>B</sup>                | 0.16            | 0.004   |
| C22:4n-6                       | 0.21 <sup>A</sup>  | 0.04 <sup>B</sup>             | 0.05 <sup>B</sup>               | 0.070 B                         | 0.06 <sup>B</sup>                | 0.01            | <0.001  |
| C22:5n-6                       | 0.00 <sup>C</sup>  | 0.07 <sup>A</sup>             | 0.01 <sup>C</sup>               | 0.012 C                         | 0.032 B                          | 0.01            | <0.001  |
| C22:5n-3                       | 0.05 <sup>B</sup>  | 0.18 <sup>A</sup>             | 0.00 <sup>C</sup>               | 0.000 C                         | 0.000 C                          | 0.01            | <0.001  |
| C22:6n-3                       | 0.11 <sup>b</sup>  | 0.25 <sup>a</sup>             | 0.19 <sup>a</sup>               | 0.116 b                         | 0.185 a                          | 0.03            | 0.034   |
| <i>CLA<sup>2</sup> isomers</i> | 0.00 <sup>B</sup>  | 406.00 <sup>A</sup>           | 340.41 <sup>A</sup>             | 372.34 <sup>A</sup>             | 361.37 <sup>A</sup>              | 12.00           | <0.001  |
| CLA_11-13tt                    | 0.00 <sup>C</sup>  | 2.00 <sup>B</sup>             | 1.26 <sup>B</sup>               | 0.718 <sup>B</sup>              | 3.44 <sup>A</sup>                | 0.86            | <0.001  |
| CLA_10-12tt                    | 0.00 <sup>C</sup>  | 5.31 <sup>A</sup>             | 3.47 <sup>B</sup>               | 2.492 <sup>B</sup>              | 3.79 <sup>B</sup>                | 0.50            | <0.001  |
| CLA_9-11tt                     | 0.00 <sup>C</sup>  | 4.72 <sup>B</sup>             | 3.15 <sup>B</sup>               | 2.656 <sup>B</sup>              | 60.97 <sup>A</sup>               | 1.40            | <0.001  |
| CLA_8-10tt                     | 0.00 <sup>D</sup>  | 59.53 <sup>A</sup>            | 1.65 <sup>C</sup>               | 2.221 <sup>C</sup>              | 24.93 <sup>B</sup>               | 1.53            | 0.002   |
| CLA_11-13ct                    | 0.00 <sup>B</sup>  | 0.00 <sup>B</sup>             | 0.00 <sup>B</sup>               | 0.00 <sup>B</sup>               | 17.44 <sup>A</sup>               | 0.84            | <0.001  |
| CLA_10-12tc                    | 0.00 <sup>C</sup>  | 163.17 <sup>A</sup>           | 172.51 <sup>A</sup>             | 182.469 <sup>A</sup>            | 111.80 <sup>B</sup>              | 6.21            | <0.001  |
| CLA_9-11ct                     | 0.00 <sup>C</sup>  | 143.51 <sup>A</sup>           | 126.55 <sup>B</sup>             | 145.87 <sup>A</sup>             | 120.11 <sup>B</sup>              | 4.58            | <0.001  |
| CLA_8-10tc                     | 0.00 <sup>D</sup>  | 16.02 <sup>C</sup>            | 30.91 <sup>B</sup>              | 35.30 <sup>A</sup>              | 18.28 <sup>C</sup>               | 2.68            | <0.001  |
| <i>Index</i>                   |                    |                               |                                 |                                 |                                  |                 |         |
| ω-6                            | 38.33              | 37.18                         | 34.14                           | 34.13                           | 32.18                            | 1.97            | 0.246   |
| ω-3                            | 3.01 <sup>C</sup>  | 4.01 <sup>B</sup>             | 4.45 <sup>A</sup>               | 4.42 <sup>A</sup>               | 3.56 <sup>B</sup>                | 0.20            | 0.002   |
| ω-6/ω-3                        | 12.74 <sup>A</sup> | 9.28 <sup>B</sup>             | 7.89 <sup>C</sup>               | 7.74 <sup>C</sup>               | 9.06 <sup>B</sup>                | 0.71            | 0.003   |
| <i>Organic acid</i>            | 0.59 <sup>C</sup>  | 12.44 <sup>B</sup>            | 28.24 <sup>A</sup>              | 23.79 <sup>A</sup>              | 22.76 <sup>A</sup>               | 4.23            | <0.001  |
| lactate                        | 0.13 <sup>B</sup>  | 3.16 <sup>A</sup>             | 2.75 <sup>A</sup>               | 2.39 <sup>A</sup>               | 3.12 <sup>A</sup>                | 0.36            | <0.001  |
| acetate                        | 0.11 <sup>C</sup>  | 0.94 <sup>B</sup>             | 2.01 <sup>A</sup>               | 1.16 <sup>B</sup>               | 1.28 <sup>B</sup>                | 0.14            | <0.001  |
| propionate                     | 0.36 <sup>C</sup>  | 6.83 <sup>B</sup>             | 21.36 <sup>A</sup>              | 18.00 <sup>A</sup>              | 15.91 <sup>A</sup>               | 3.55            | <0.001  |
| butyrate                       | 0.00 <sup>C</sup>  | 1.51 <sup>B</sup>             | 2.13 <sup>A</sup>               | 2.24 <sup>A</sup>               | 2.45 <sup>A</sup>                | 0.31            | <0.001  |

<sup>1</sup>SE: Standard Error; <sup>2</sup>CLA: Conjugated Linoleic Acid.

<sup>a-c</sup>: means within rows with different letters significantly differ (P ≤ 0.05)

<sup>A-D</sup>: means within rows with different letters significantly differ (P ≤ 0.01)

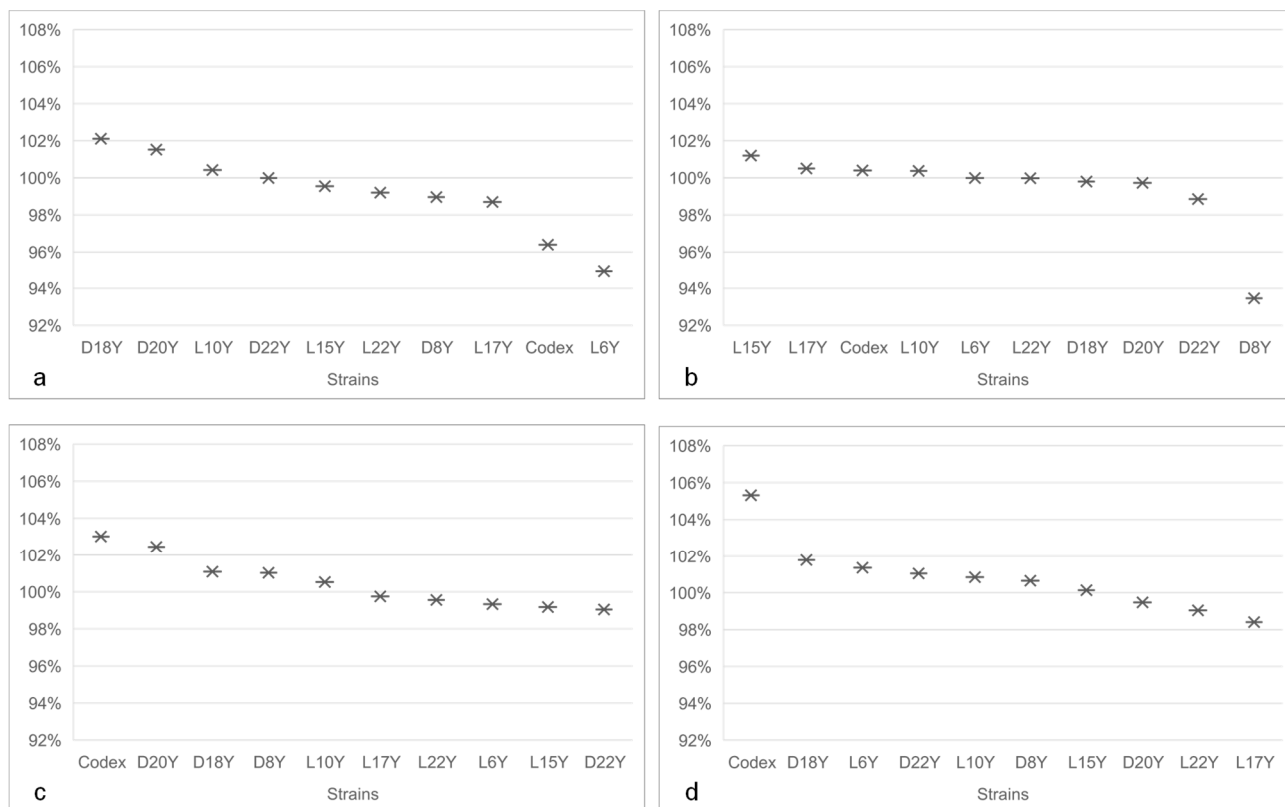

**Supplementary Figure S1.** Survival percentage of the 10 *Saccharomyces cerevisiae* strains after incubation under simulated gastric conditions at pH 2.0 (**a**), 3.0 (**b**), 8.0 (**c**), and 2.0, with reconstituted skim milk added (10%) (**d**), for 180 min, and further intestinal digestion at pH 8.0 for 360 min. Stars are the mean values (n =3)
